# Supplementary material for: The anatomical distribution of genetic associations
Source: PubMed Central journal article supplement — Nucleic Acids Res. 2015 Nov 19;43(22):10804–20. doi: 10.1093/nar/gkv1262 (PMC4678833; doi:10.1093/nar/gkv1262), 2015-11-19
Supplement: supp_gkv1262_nar-02795-n-2015-File011.pdf [file supp_gkv1262_nar-02795-n-2015-File011.pdf]

# Supplemental Information

**Movie S1. TSEA plots for each of the 57 traits from the GWAS catalog that had a significant result in at least one tissue.**

**Table S1. Summarized RPKM values of 18,056 genes across 25 tissues from GTEx.**

**Table S3. pSI values for all genes across 25 tissues available from GTEx.** Derived by pSI analysis of GTEx data release dated 1/31/13. Genes in rows, tissues in columns. Sub-dissections of the same tissue were aggregated into a single tissue. First row contains tissue names, first column contains HUGO approved gene names. NA = pSI > 0.1.

**Table S2. Key for which sub tissues were summarized into whole tissue.**

| <b>Sub tissue</b>                     | <b>Whole tissue</b> |
|---------------------------------------|---------------------|
| Adipose Subcutaneous                  | Adipose Tissue      |
| Adipose Visceral Omentum              | Adipose Tissue      |
| Adrenal Gland                         | Adrenal Gland       |
| Artery Aorta                          | Blood Vessel        |
| Artery Coronary                       | Blood Vessel        |
| Artery Tibial                         | Blood Vessel        |
| Brain Amygdala                        | Brain               |
| Brain Anterior cingulate cortex BA24  | Brain               |
| Brain Caudate basal ganglia           | Brain               |
| Brain Cerebellar Hemisphere           | Brain               |
| Brain Cerebellum                      | Brain               |
| Brain Cortex                          | Brain               |
| Brain Frontal Cortex BA9              | Brain               |
| Brain Hippocampus                     | Brain               |
| Brain Hypothalamus                    | Brain               |
| Brain Nucleus accumbens basal ganglia | Brain               |
| Brain Putamen basal ganglia           | Brain               |
| Brain Spinal cord cervical            | Brain               |
| Brain Substantia nigra                | Brain               |
| Breast Mammary Tissue                 | Breast              |
| Cells EBV transformed lymphocytes     | NA                  |
| Cells Transformed fibroblasts         | NA                  |
| Colon Transverse                      | Colon               |
| Esophagus Mucosa                      | Esophagus           |
| Esophagus Muscularis                  | Esophagus           |
| Fallopian Tube                        | Fallopian Tube      |
| Heart Atrial Appendage                | Heart               |
| Heart Left Ventricle                  | Heart               |
| Kidney Cortex                         | Kidney              |
| Liver                                 | Liver               |
| Lung                                  | Lung                |
| Muscle Skeletal                       | Muscle              |
| Nerve Tibial                          | Nerve               |
| Ovary                                 | Ovary               |
| Pancreas                              | Pancreas            |
| Pituitary                             | Pituitary           |
| Prostate                              | Prostate            |
| Skin Not Sun Exposed Suprapubic       | Skin                |
| Skin Sun Exposed Lower leg            | Skin                |
| Stomach                               | Stomach             |
| Testis                                | Testis              |
| Thyroid                               | Thyroid             |
| Uterus                                | Uterus              |
| Vagina                                | Vagina              |
| Whole Blood                           | Blood               |

**Table S 4: Validation of tissue specific transcript enrichment by systematic GO analysis.** Results of enrichment analyses using the TSEA tool for gene lists derived for each tissue at multiple pSI thresholds compared to a GO term selected to represent the development of that tissue ('On Target Results' columns). Note that several tissues had no unique GO term (Colon, Esophagus, and Stomach all utilized the same 119 genes associated with 'GO:0048565, digestive track development'). Also included, a matrix of the highest TSEA p value for analysis of random gene lists of identical length ("Random gene list" columns). No significant overlap was seen at any threshold using randomly selected genes.

|                | GO.ID      | GO.term                     | # of genes in GO term | On Target results for each tissue, by pSI |           |           |           |           | Random gene list |           |           |   |  |
|----------------|------------|-----------------------------|-----------------------|-------------------------------------------|-----------|-----------|-----------|-----------|------------------|-----------|-----------|---|--|
|                |            |                             |                       | pSI_.05                                   | pSI_.01   | pSI_.001  | pSI_.0001 | pSI_.05   | pSI_.01          | pSI_.001  | pSI_.0001 |   |  |
| Adipose Tissue | GO:0060612 | adipose tissue development  | 27                    | 0.2245283                                 | 0.6447261 | 1         | 0.4994756 | 0.7767606 | 0.9425186        | 1         | 1         | 1 |  |
| Adrenal Gland  | GO:0030325 | adrenal gland development   | 26                    | 0.0516088                                 | 0.0502182 | 0.0024848 | 0.0158593 | 1         | 1                | 1         | 1         | 1 |  |
| Blood          | GO:0002520 | immune system development   | 664                   | 9.61E-33                                  | 1.80E-24  | 9.55E-06  | 1         | 0.7529454 | 0.7157377        | 1         | 1         | 1 |  |
| Blood Vessel   | GO:0001568 | blood vessel development    | 535                   | 8.51E-18                                  | 1.28E-13  | 0.1609899 | 1         | 0.8526613 | 0.9797447        | 1         | 1         | 1 |  |
| Brain          | GO:0007420 | brain development           | 568                   | 5.74E-21                                  | 1.94E-22  | 1.37E-17  | 7.02E-18  | 0.9912776 | 0.9985581        | 1         | 1         | 1 |  |
| Breast         | GO:0030879 | mammary gland development   | 140                   | 4.74E-07                                  | 0.0027594 | 0.0470135 | 0.0822336 | 0.8979868 | 1                | 0.9067467 | 0.8962612 | 1 |  |
| Colon          | GO:0048565 | digestive tract development | 119                   | 0.0012155                                 | 0.2698233 | 1         | 1         | 0.9632348 | 1                | 1         | 1         | 1 |  |
| Esophagus      | GO:0048565 | digestive tract development | 119                   | 0.0582282                                 | 0.6190532 | 1         | 1         | 0.9665582 | 1                | 1         | 1         | 1 |  |
| Fallopian Tube | GO:0060066 | oviduct development         | 3                     | 1                                         | 1         | 1         | 1         | 1         | 1                | 1         | 1         | 1 |  |
| Heart          | GO:0007507 | heart development           | 424                   | 5.54E-16                                  | 1.00E-20  | 7.21E-18  | 2.59E-11  | 0.9998406 | 0.9644155        | 1         | 1         | 1 |  |
| Kidney         | GO:0001822 | kidney development          | 221                   | 5.02E-08                                  | 2.90E-09  | 1.53E-07  | 5.85E-06  | 0.8168252 | 0.9675896        | 1         | 1         | 1 |  |
| Liver          | GO:0001889 | liver development           | 105                   | 3.75E-09                                  | 8.00E-06  | 0.1509639 | 0.6523775 | 0.9900871 | 1                | 1         | 1         | 1 |  |
| Lung           | GO:0030324 | lung development            | 171                   | 0.0007387                                 | 0.0146273 | 0.9612879 | 0.5134674 | 0.9998393 | 1                | 1         | 1         | 1 |  |
| Muscle         | GO:0060537 | muscle development          | 320                   | 2.33E-21                                  | 1.79E-21  | 2.49E-14  | 0.0004612 | 0.8205008 | 0.9747358        | 0.7229468 | 0.9832756 | 1 |  |
| Nerve          | GO:0021675 | nerve development           | 73                    | 0.011859                                  | 0.0133223 | 0.0162835 | 0.6620925 | 0.6590795 | 0.8963201        | 1         | 1         | 1 |  |
| Ovary          | GO:0008585 | female gonad development    | 96                    | 0.0001898                                 | 8.27E-07  | 0.2545461 | 0.0645636 | 0.8615195 | 1                | 0.9632877 | 0.578157  | 1 |  |
| Pancreas       | GO:0031016 | pancreas development        | 82                    | 2.31E-13                                  | 3.47E-11  | 0.0189874 | 1         | 1         | 0.8824443        | 1         | 1         | 1 |  |
| Pituitary      | GO:0021983 | pituitary gland development | 45                    | 0.0002955                                 | 6.84E-05  | 0.0001013 | 0.0001724 | 0.8987947 | 1                | 1         | 1         | 1 |  |
| Prostate       | GO:0030850 | prostate gland development  | 50                    | 7.98E-05                                  | 0.0016398 | 0.090186  | 0.7277544 | 1         | 1                | 1         | 1         | 1 |  |
| Skin           | GO:0043588 | skin development            | 313                   | 5.68E-82                                  | 6.36E-77  | 1.13E-56  | 2.47E-38  | 0.9972169 | 0.9952375        | 1         | 1         | 1 |  |
| Stomach        | GO:0048565 | digestive tract development | 119                   | 0.000109                                  | 0.19514   | 1         | 1         | 0.9212691 | 0.9703533        | 1         | 1         | 1 |  |
| Testis         | GO:0008584 | male gonad development      | 122                   | 0.000186                                  | 0.0055787 | 0.0039445 | 0.0385807 | 0.6120688 | 0.7348369        | 1         | 1         | 1 |  |
| Thyroid        | GO:0030878 | thyroid gland development   | 19                    | 0.0250885                                 | 0.0019105 | 0.0008738 | 5.60E-05  | 1         | 1                | 1         | 1         | 1 |  |
| Uterus         | GO:0060065 | uterus development          | 14                    | 0.1065938                                 | 0.1341815 | 0.3577264 | 1         | 1         | 1                | 1         | 1         | 1 |  |
| Vagina         | GO:0060068 | vagina development          | 12                    | 0.3888183                                 | 0.3004131 | 1         | 1         | 1         | 1                | 1         | 1         | 1 |  |

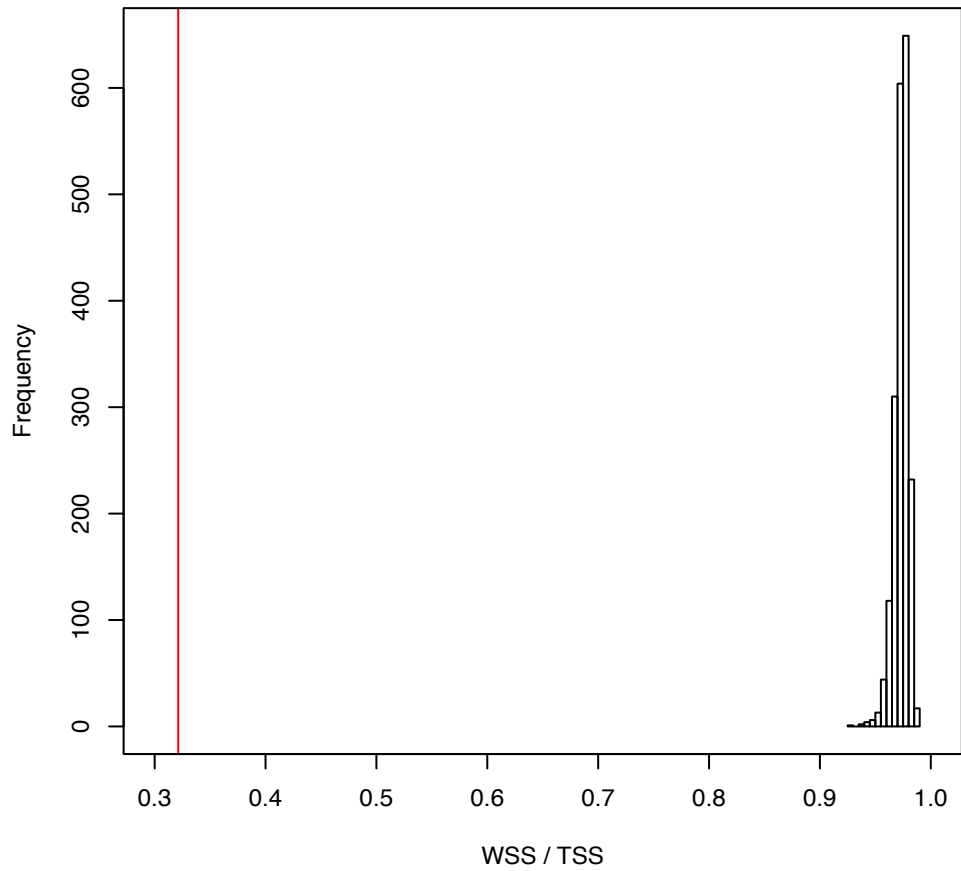

**Figure S1. Within tissue variation of gene expression is less than expected by chance.** The observed within tissue variation across all genes within a tissue is 0.321 (red line) which is always less than the within tissue variance calculated by permuting the tissue group 2000 times (histogram) ( $p < 1/2000$ ).

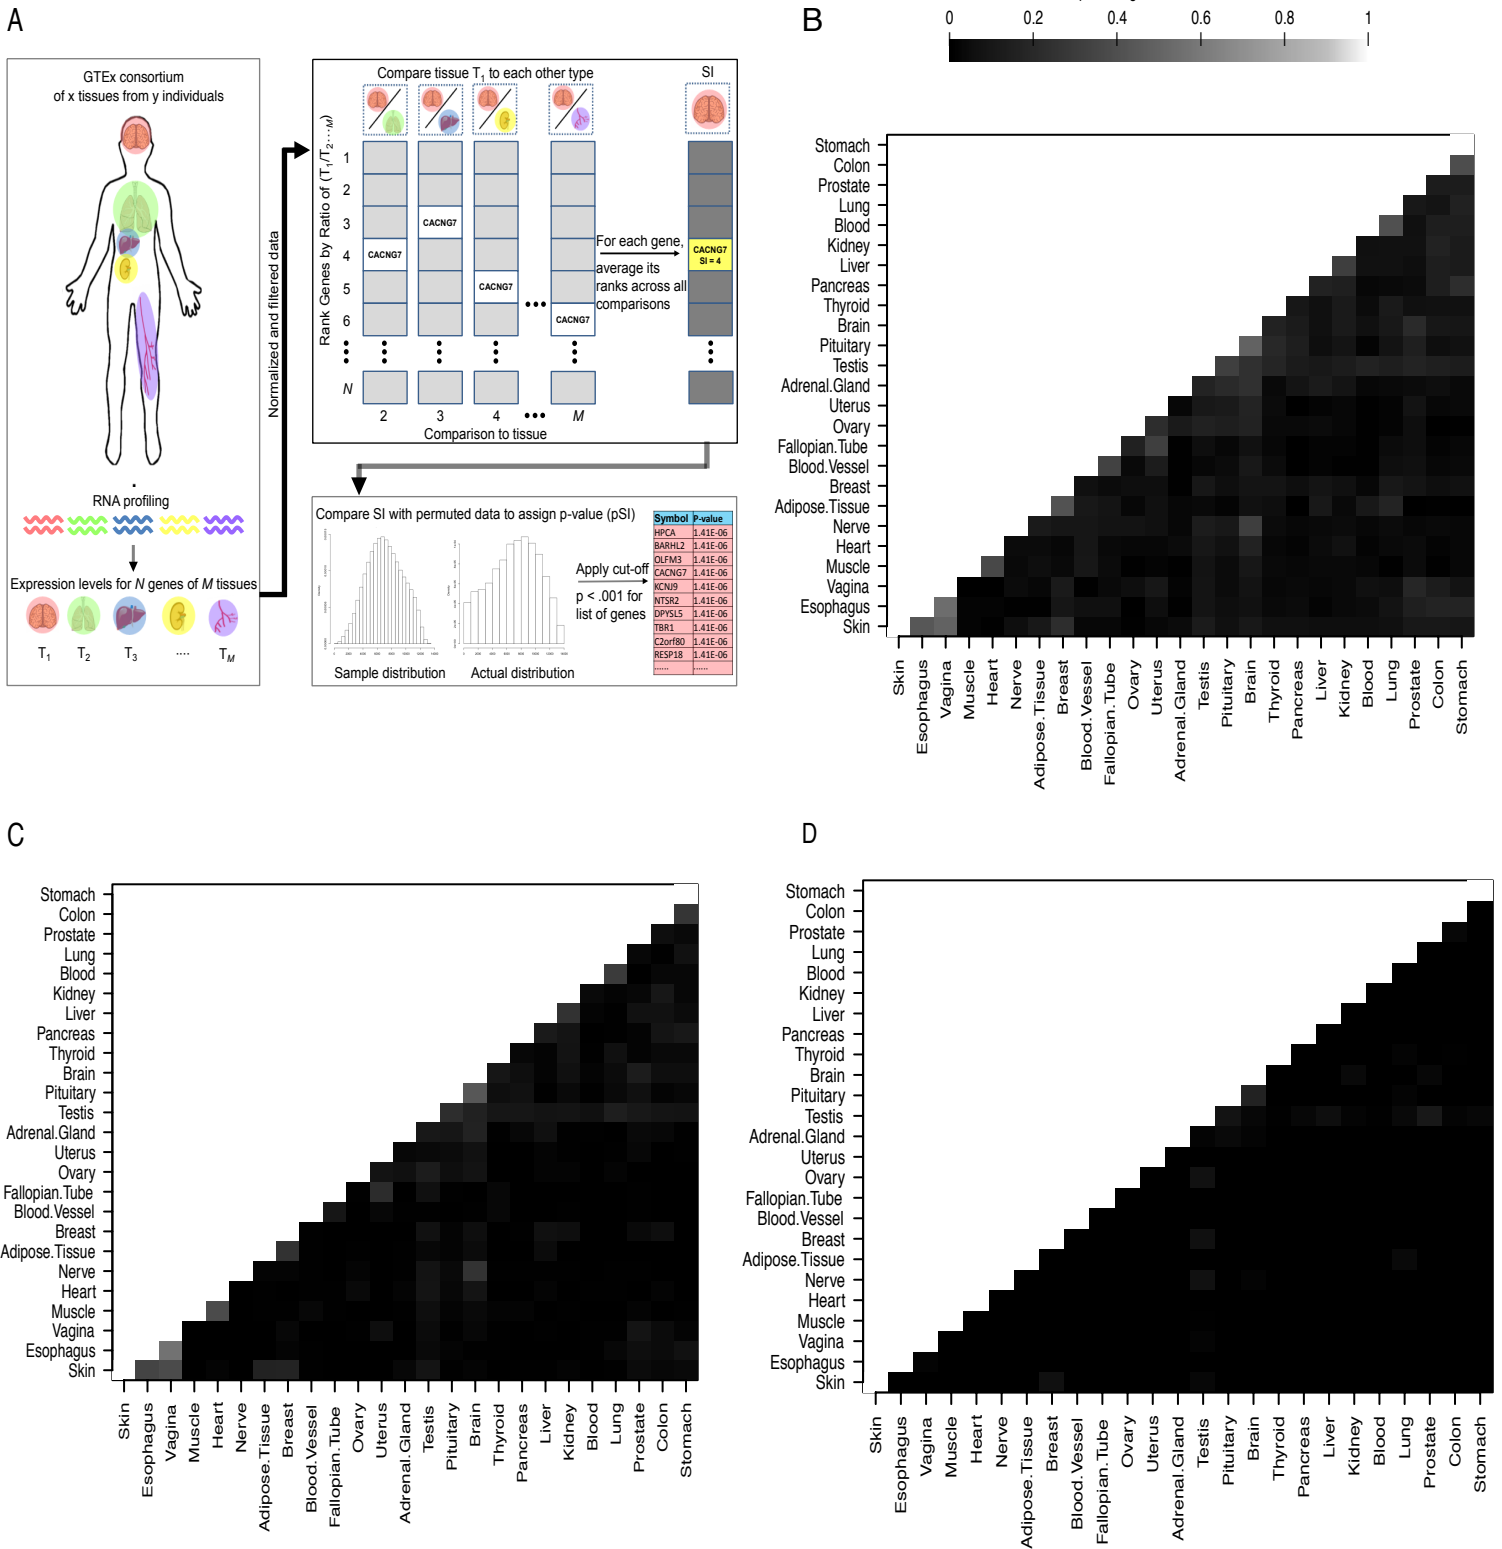

**Figure S2. Fraction of tissue enriched transcript lists that overlap at moderate and stringent thresholds.** A) Cartoon of the pSI method used to define tissue specific gene lists. B) moderately enriched transcript lists ( $pSI < 0.05$ ) are large and show substantial overlap between related tissues; C) an intermediate threshold ( $pSI < 0.01$ ) identifies a smaller number of transcripts with less overlap between tissue; D) a more stringent threshold ( $pSI < 0.001$ ) shows the least amount of overlap. Data from  $pSI < 0.0001$  not shown.

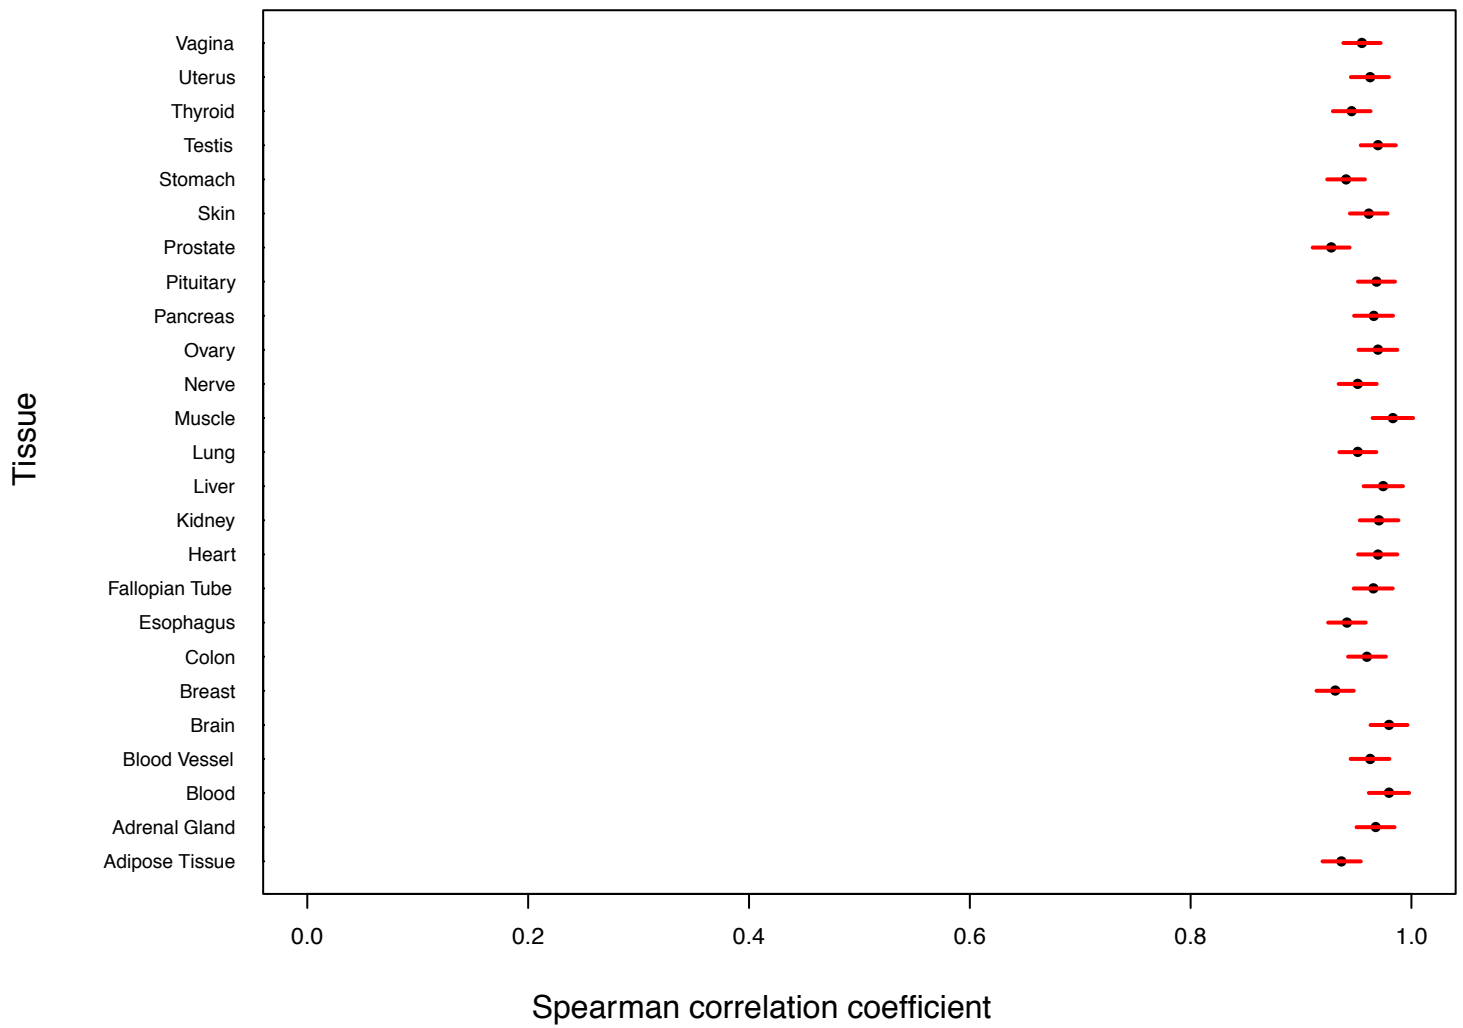

**Figure S3. Shannon entropy and SI values of genes in tissues are correlated.**  
 Spearman's correlation between Shannon entropy and SI values for genes within tissues.  
 Displayed as point estimate  $\pm$  2 S.E.

A

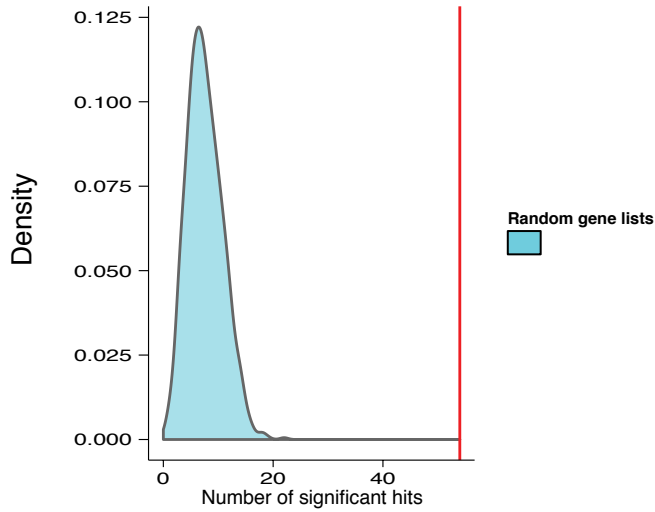

B

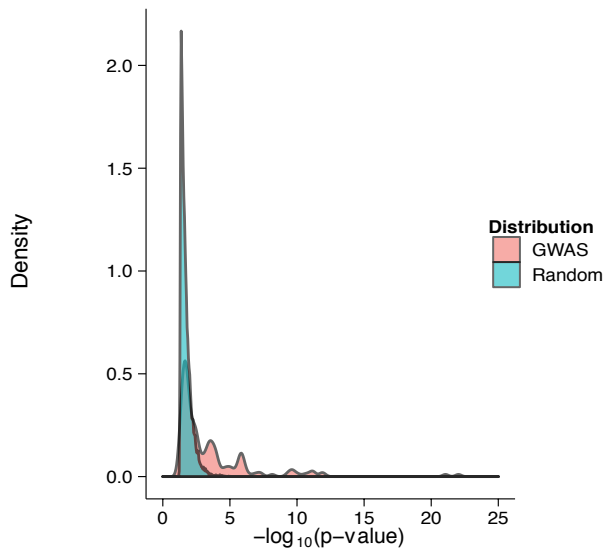

**Figure S4. Selective expression results are robust to how SNPs are assigned to genes.** A) Of the 87 quantitative and disease trait associated gene lists examined, 54 (red line), showed enrichment in at least one tissue. 1000 randomizations of 87 equivalently sized random gene lists resulted in a mean of 8.81 ( $\pm$  3.53 s.d.) gene lists showing enrichment (blue distribution). B) Median statistical enrichment of those random gene lists showing signal was  $p$ -value=0.026 (1.58 as plotted in  $-\log_{10}$  scale, blue distribution, range: 0.05 to 2.83E-6), while those from disease and trait associated lists was  $p$ -value=0.0027 (2.57, pink distribution, range: 0.05 to 8.50E-28).

A

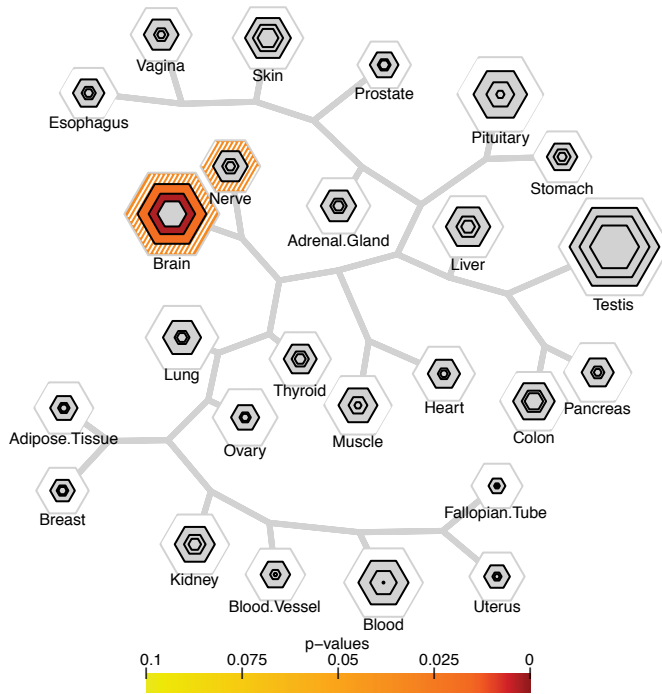

B

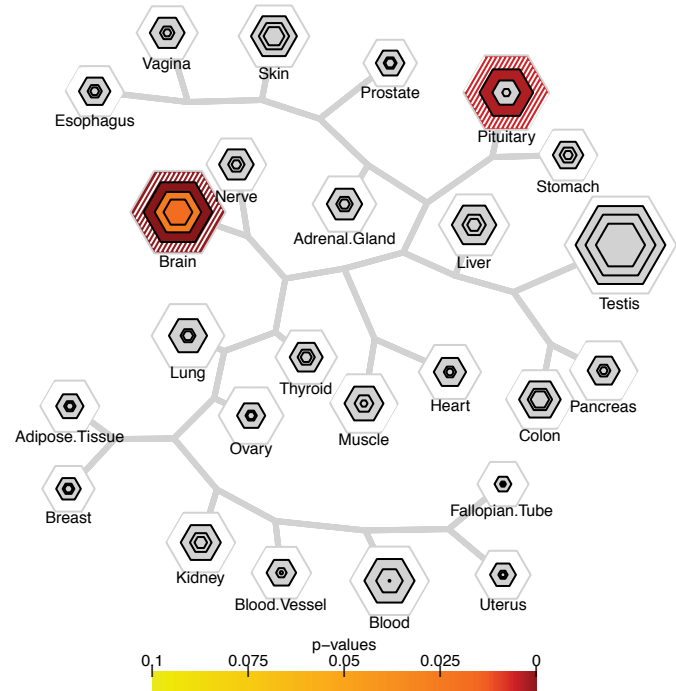

**Figure S5. TSEA results using exome data.** A) 49 genes with multiple observed de novo mutations in exomes from children with autism are enriched in the brain and nerve. B) 18 genes with multiple observed de novo mutations in exomes from children with epilepsy are enriched in the brain and pituitary.
